# Supplementary material for: An efficient and eco-compatible multicomponent synthesis of 2,4,5-trisubstituted imidazole derivatives using modified-silica-coated cobalt ferrite nanoparticles with tungstic acid
Source: Royal Society of Chemistry journal article supplement (doi:10.1039/d2dt03021g), 2022-12-19
Supplement: d2dt03021g1.pdf [file d2dt03021g1.pdf]

## Supporting information

### **An efficient and eco-compatible multicomponent synthesis of 2,4,5-trisubstituted imidazole derivatives via modified-silica coated cobalt ferrite nanoparticles by Tungstic acid**

Shadan Kermanizadeh, Setareh Mousavi, Hossein Naeimi\*

*Department of Organic Chemistry, Faculty of Chemistry, University of Kashan, Kashan, 87317-51167, I.R. Iran; Tel: 98-31-55912388; Fax: 983155912397; E-mail: [Naeimi@kashanu.ac.ir](mailto:Naeimi@kashanu.ac.ir)*

#### **General synthetic process for tri-substituted imidazole derivatives**

Accurate amounts of benzil (1 mmol), benzaldehyde (1 mmol), ammonium acetate (2 mmol) and  $\text{CoFe}_2\text{O}_4@\text{SiO}_2@(-\text{CH}_2)_3\text{OWO}_3\text{H}$  (0.01 g) were stirred under neat condition at 110 °C for 15-50 min. After the reaction was supplemented (TLC), the mixture was dissolved in ethanol and the catalyst was separated by an external magnet, washed several times with acetone and dried at 100°C for 5 h in the oven for reusing in subsequent cycles. Eventually, few drops of ice-cold water were added to the remaining solution and the precipitate was washed by petroleum ether and recrystallized from ethanol or acetone-water mixture, if needed, to give pure target products. Every single product was verified by reconciling its melting point in literatures and using spectroscopic methods such as FT-IR and  $^1\text{H}$  NMR.

## FT-IR and <sup>1</sup>H NMR Spectra of synthesized 2,4,5-trisubstituted imidazole derivatives:

### Table of Contents

|                                                         |    |
|---------------------------------------------------------|----|
| 2,4,5-triphenylimidazole (4a) .....                     | 2  |
| 2-(4-fluorophenyl)-4,5-diphenylimidazole (4b) .....     | 3  |
| 2-(4-chlorophenyl)-4,5-diphenylimidazole (4c) .....     | 4  |
| 2-(2-chlorophenyl)-4,5-diphenylimidazole (4d) .....     | 5  |
| 2-(2,4-dichlorophenyl)-4,5-diphenylimidazole (4e) ..... | 6  |
| 2-(4-bromophenyl)-4,5-diphenylimidazole (4f) .....      | 7  |
| 2-(4-Hydroxyphenyl)-4,5-diphenylimidazole (4g) .....    | 8  |
| 2-(3-Hydroxyphenyl)-4,5-diphenylimidazole (4h) .....    | 9  |
| 2-(4-methoxyphenyl)-4,5-diphenylimidazole (4i) .....    | 10 |
| 2-(2-nitrophenyl)-4,5-diphenylimidazole (4j) .....      | 11 |
| 2-(3-nitrophenyl)-4,5-diphenylimidazole (4k) .....      | 12 |
| 2-(4-nitrophenyl)-4,5-diphenylimidazole (4l) .....      | 13 |

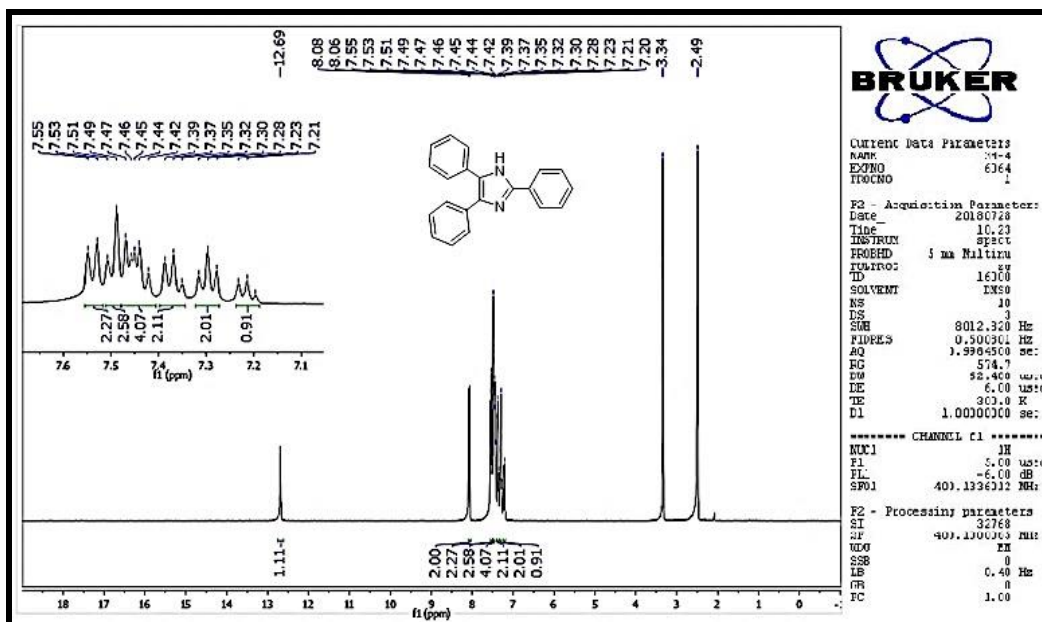

<sup>1</sup>H NMR of 4a

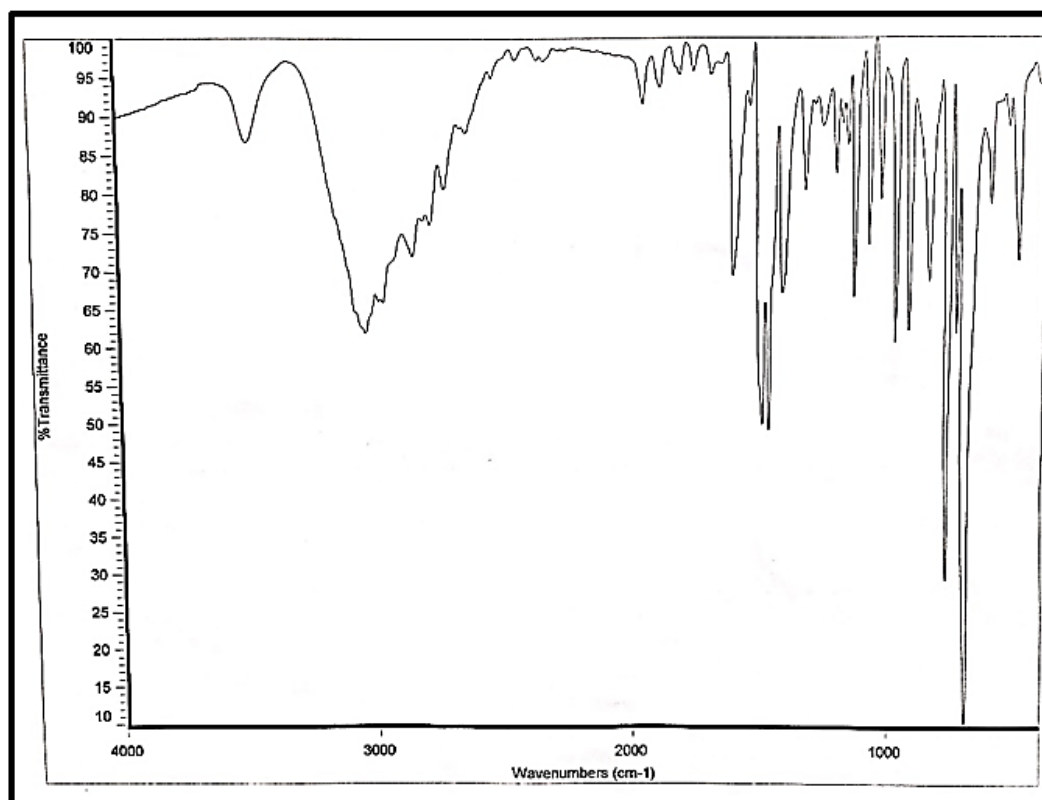

FT-IR of 4a

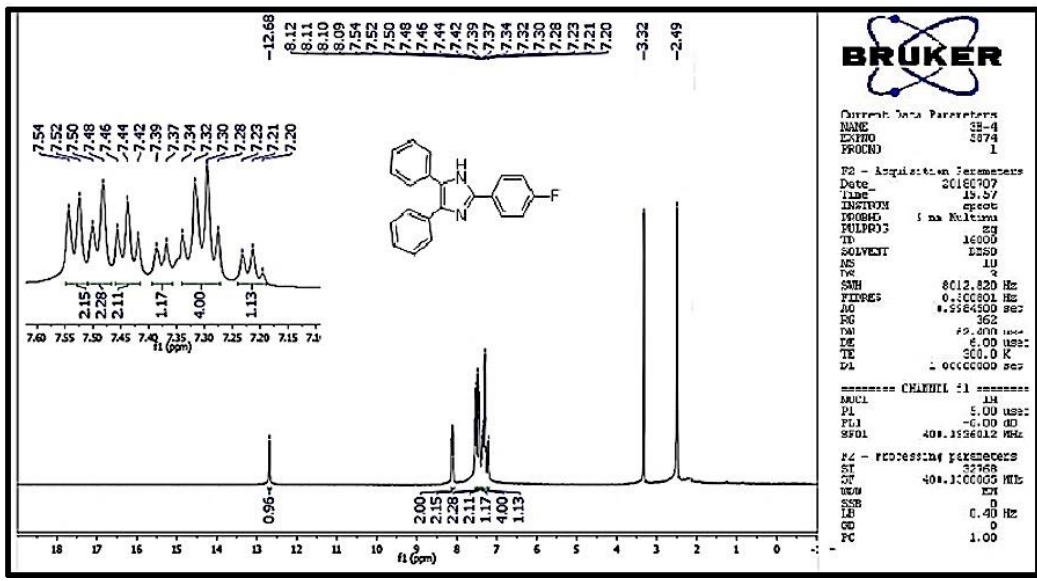

<sup>1</sup>H NMR of 4b

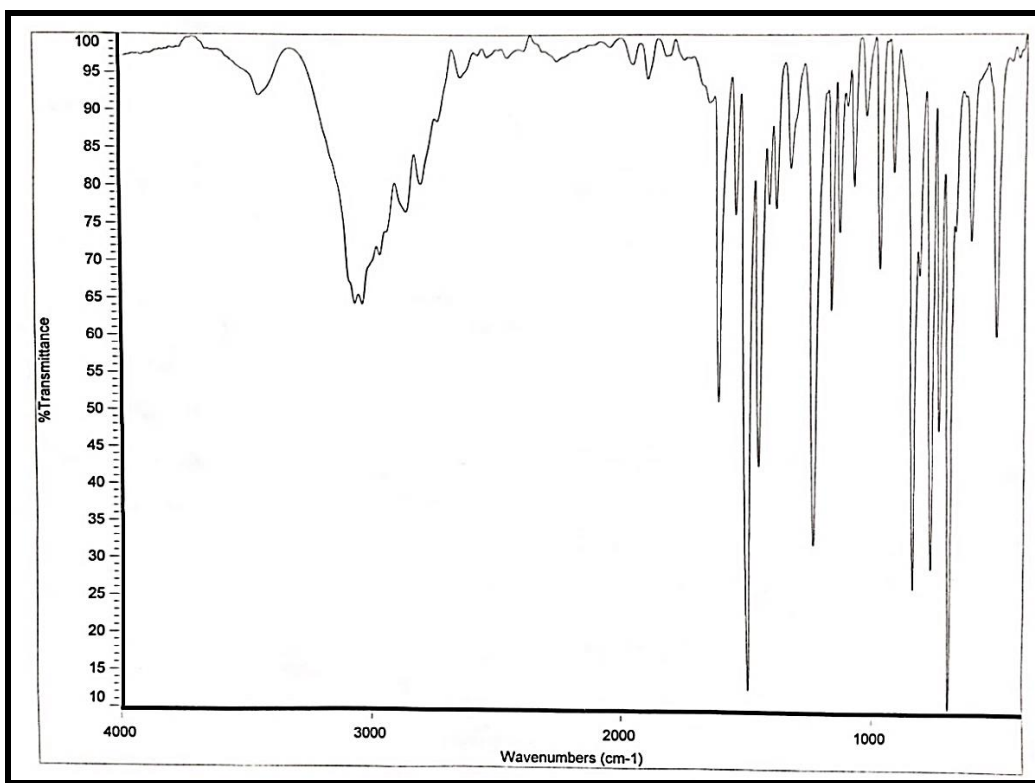

FT-IR of 4b

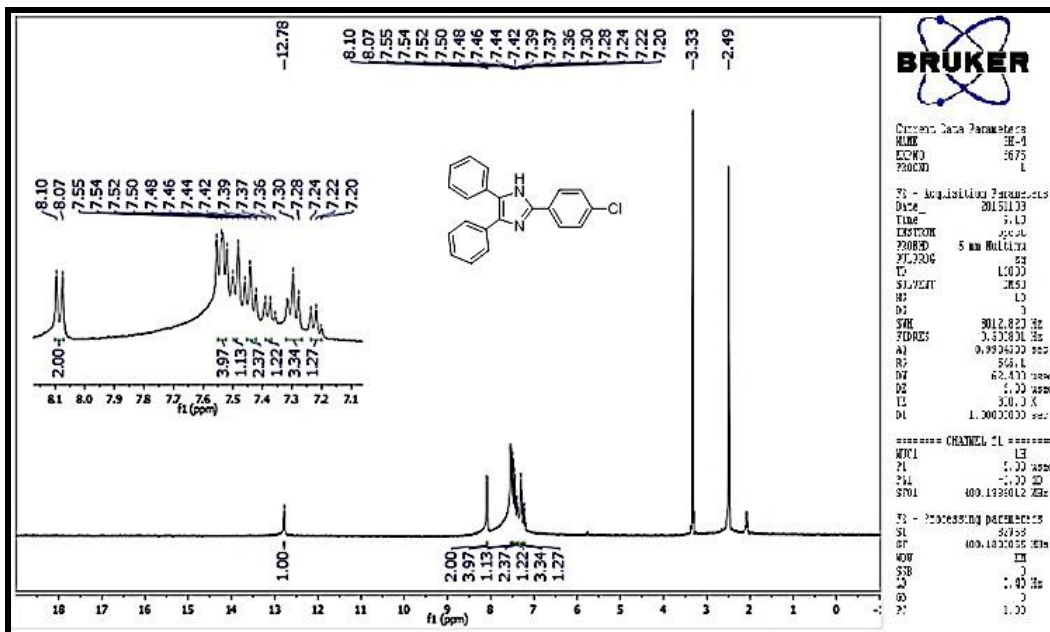

<sup>1</sup>H NMR of 4c

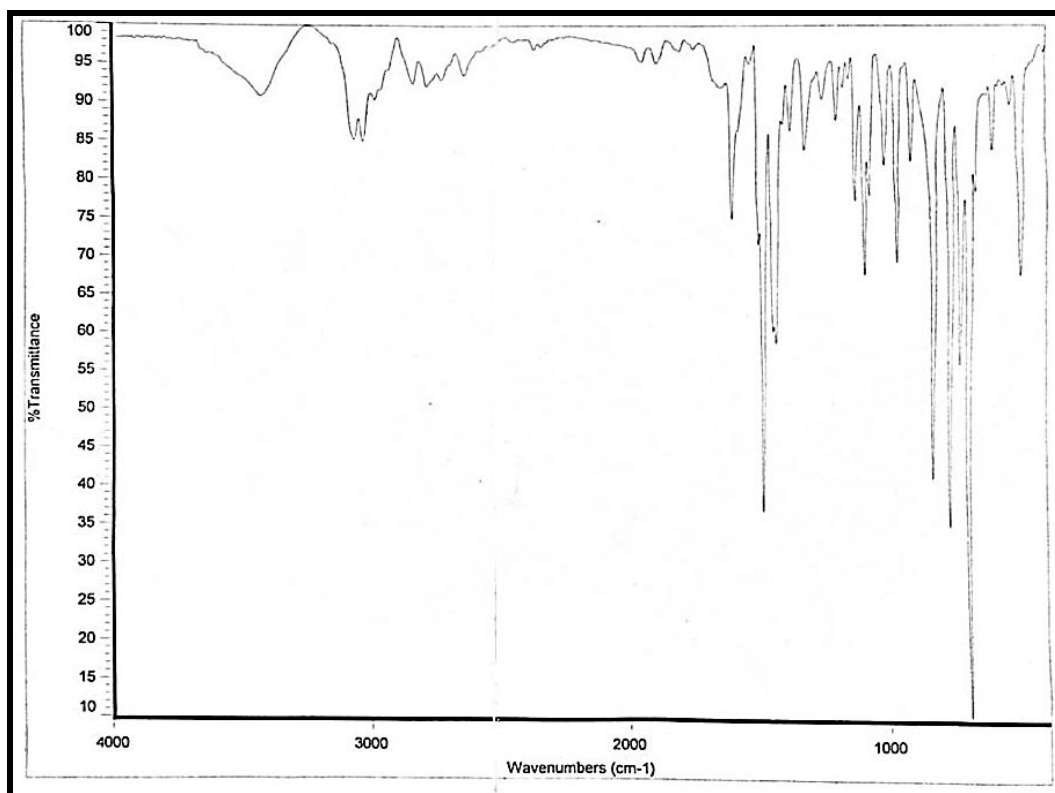

FT-IR of 4c

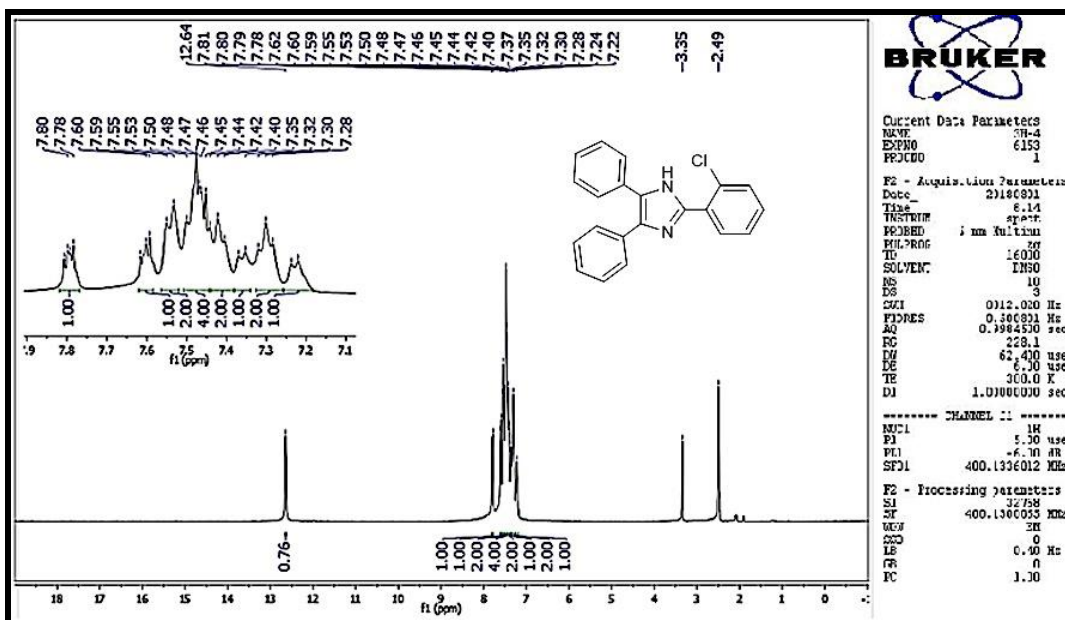

<sup>1</sup>H NMR of 4d

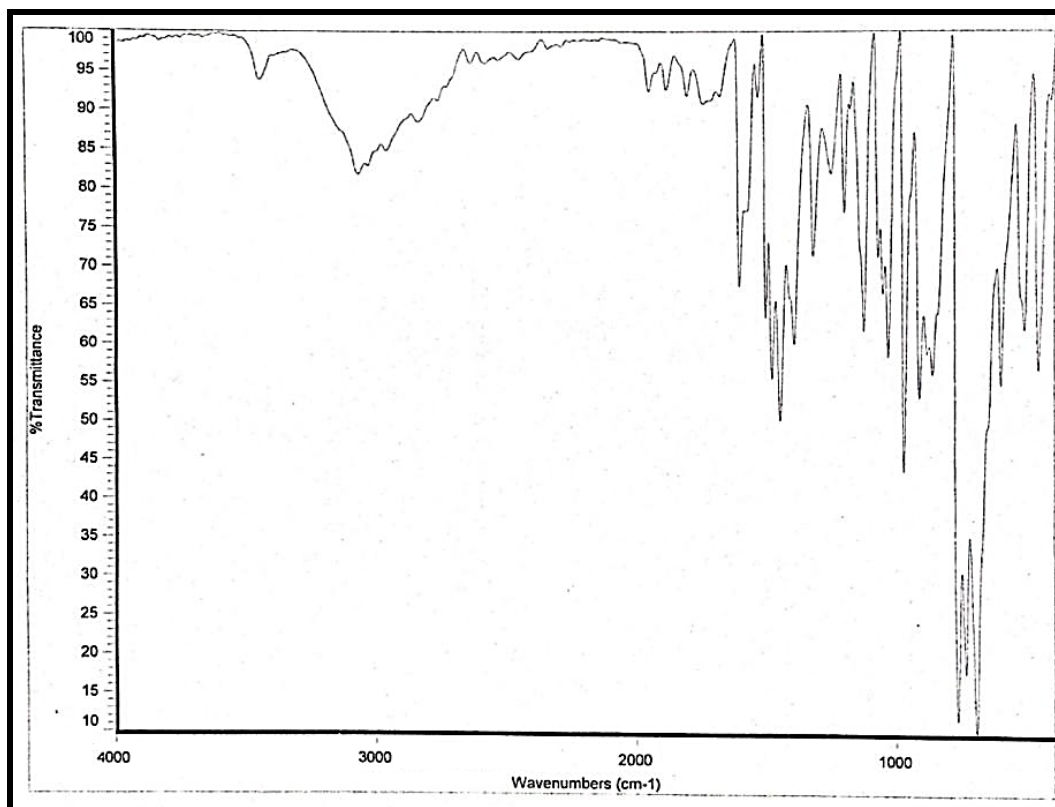

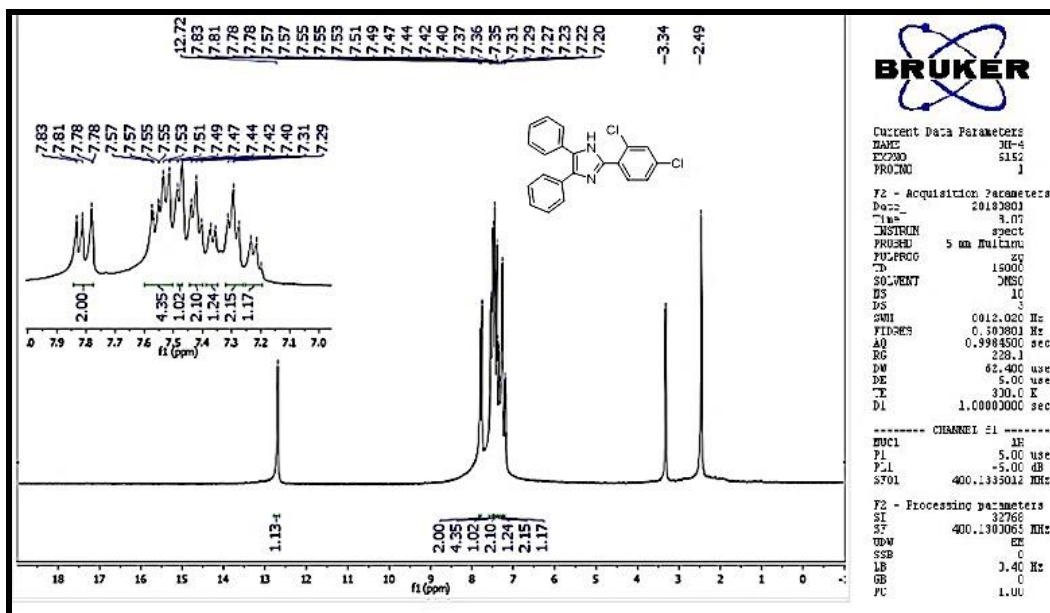

$^1\text{H}$  NMR of **4e**

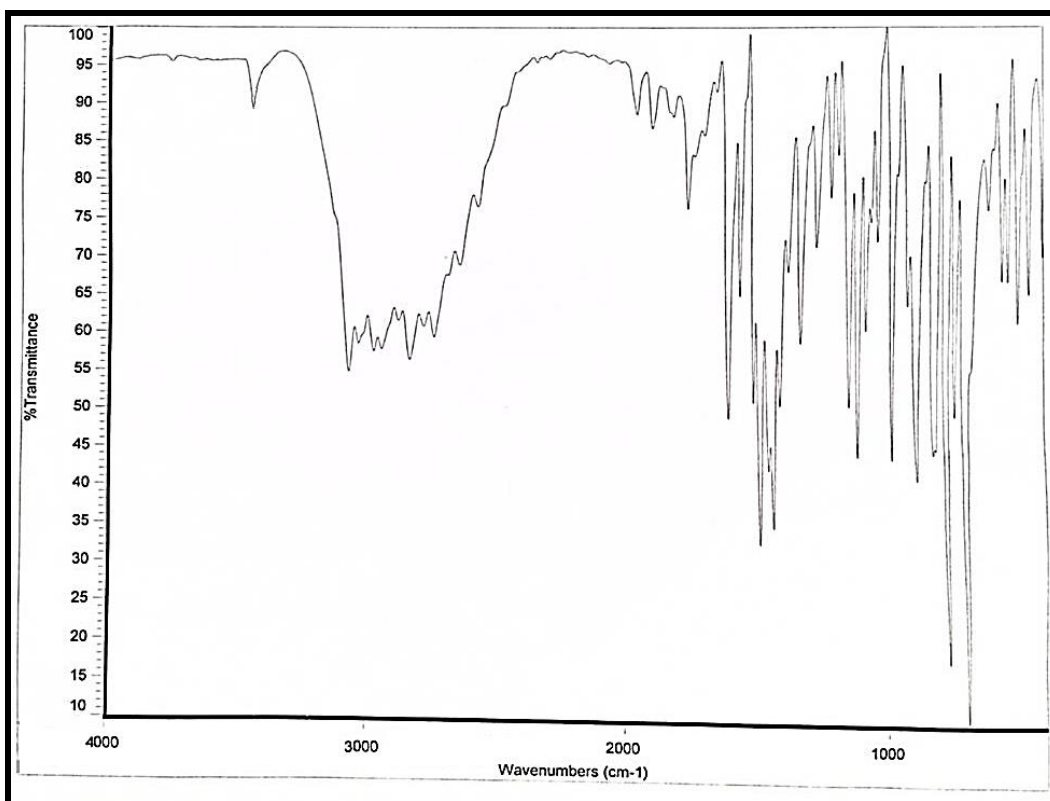

FT-IR of **4e**

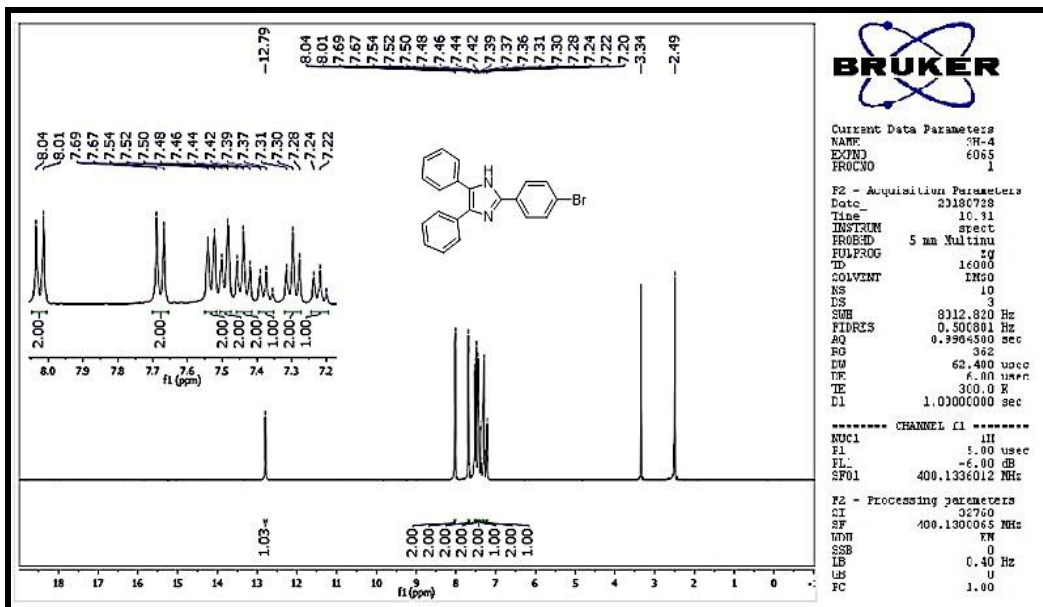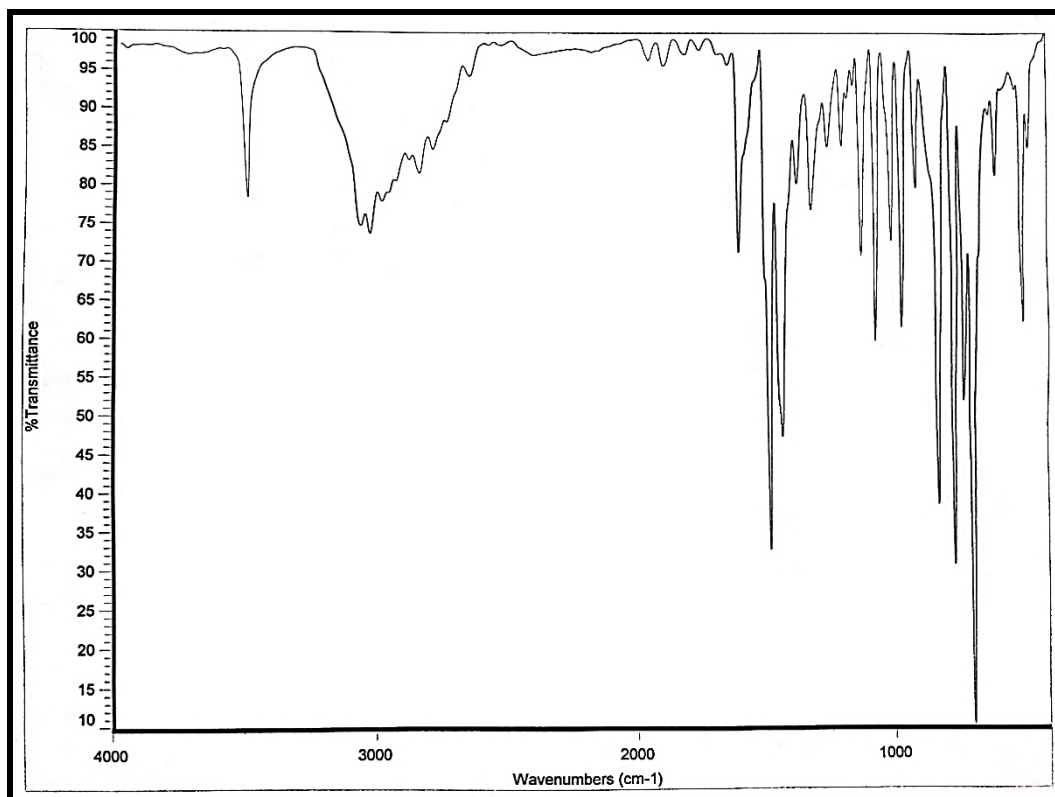



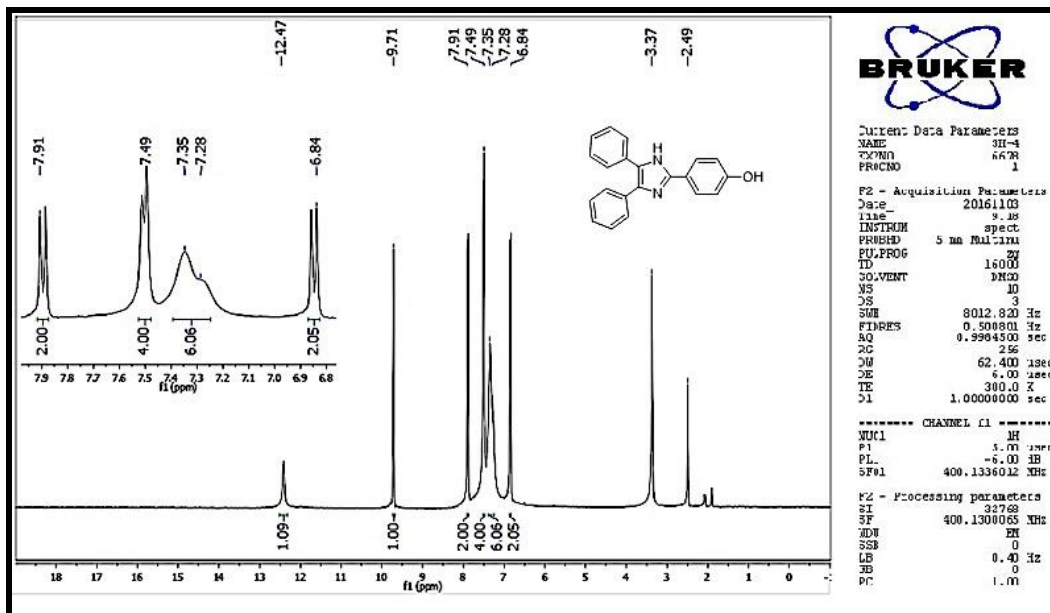

$^1\text{H}$  NMR of **4g**

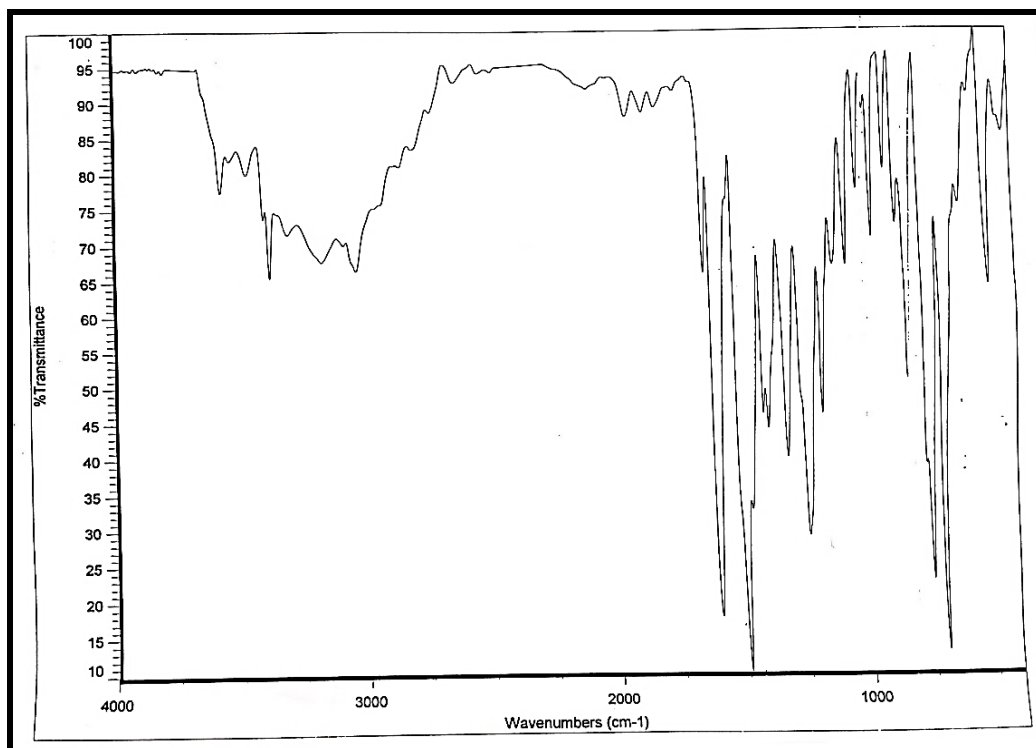

FT-IR of **4g**

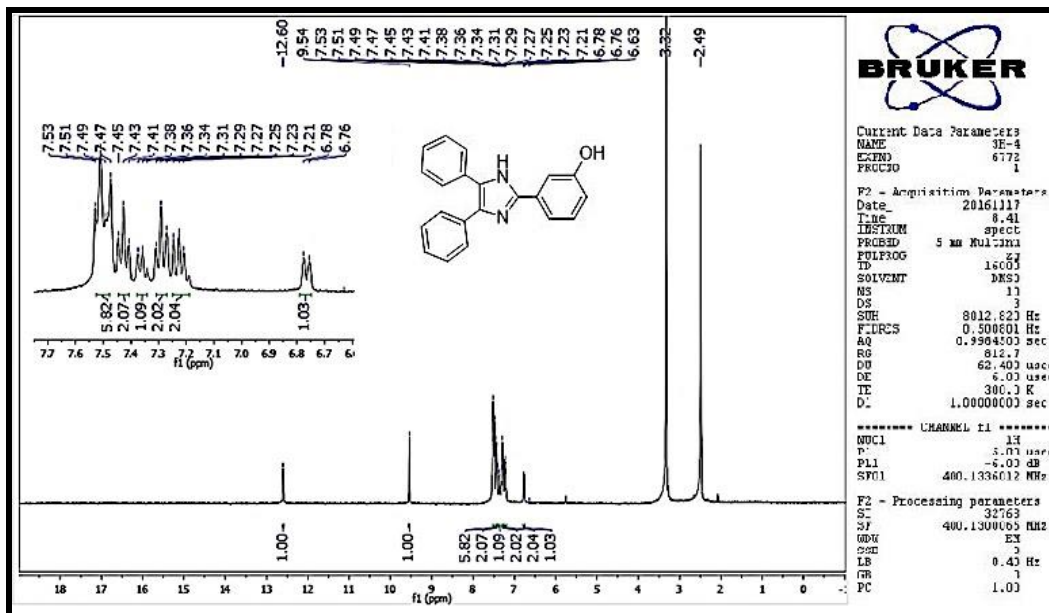

$^1\text{H}$  NMR of **4h**

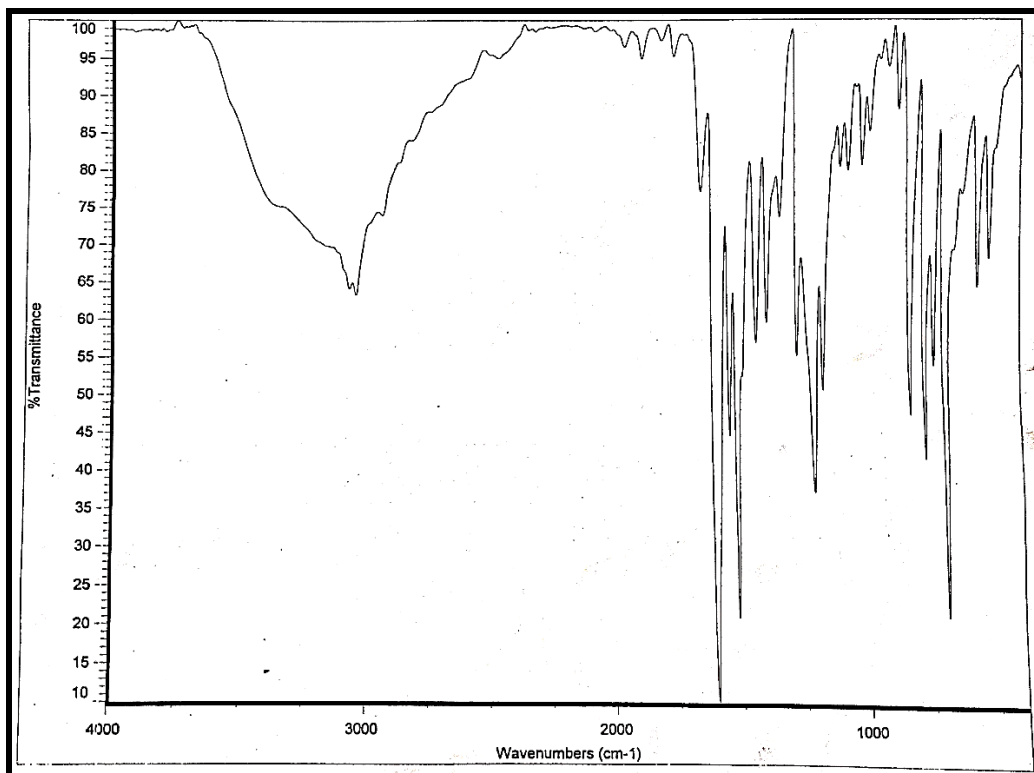

FT-IR of **4h**

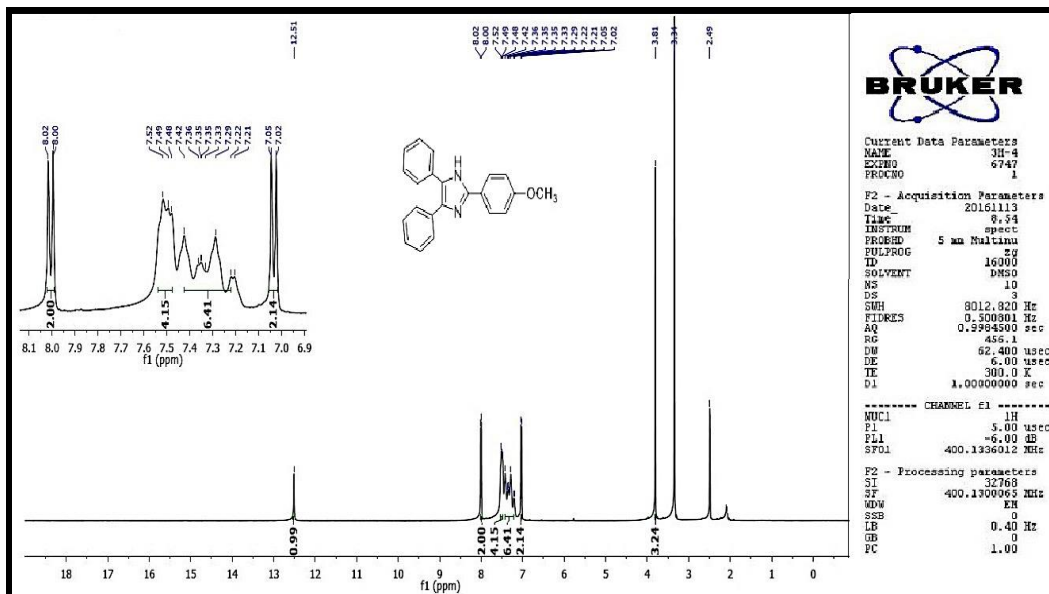

<sup>1</sup>H NMR of **4i**

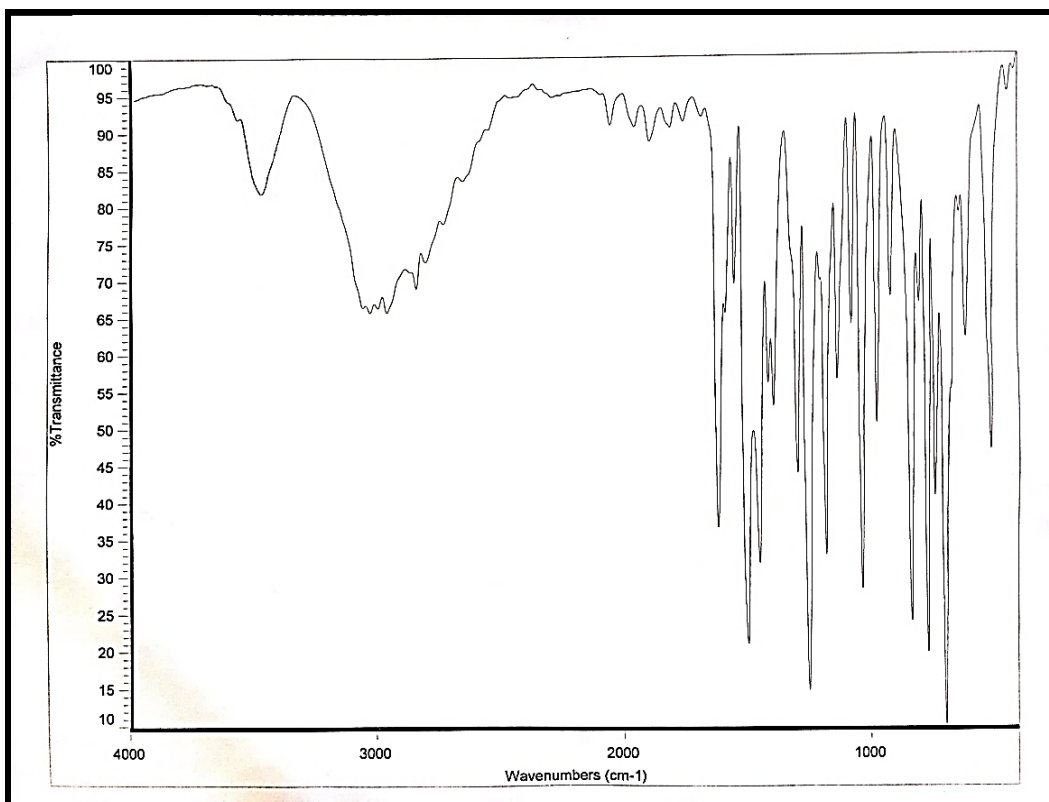

FT-IR of **4i**



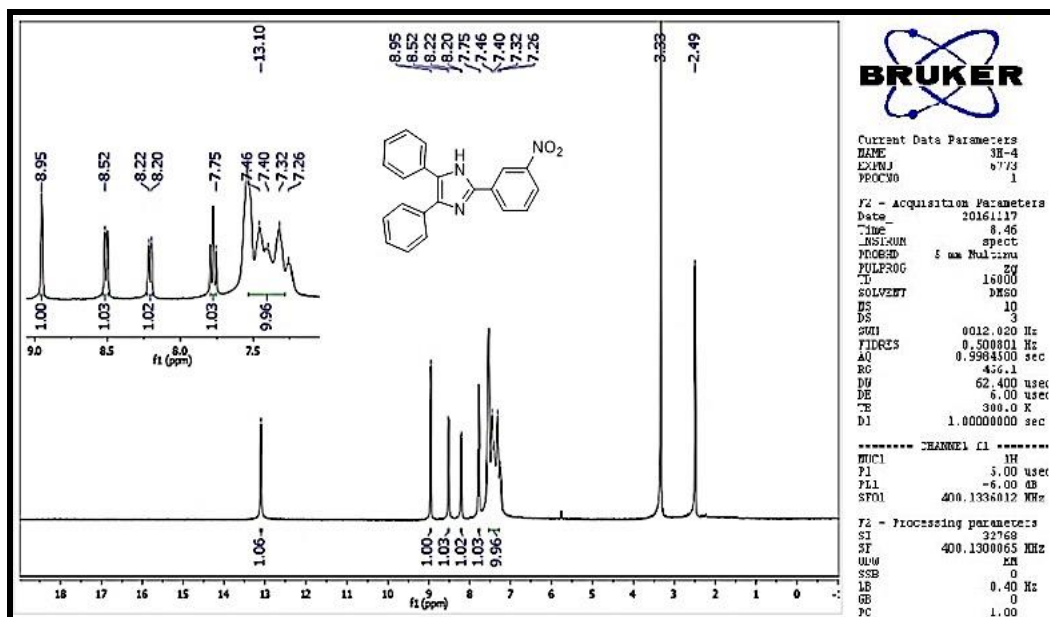

<sup>1</sup>H NMR of 4k

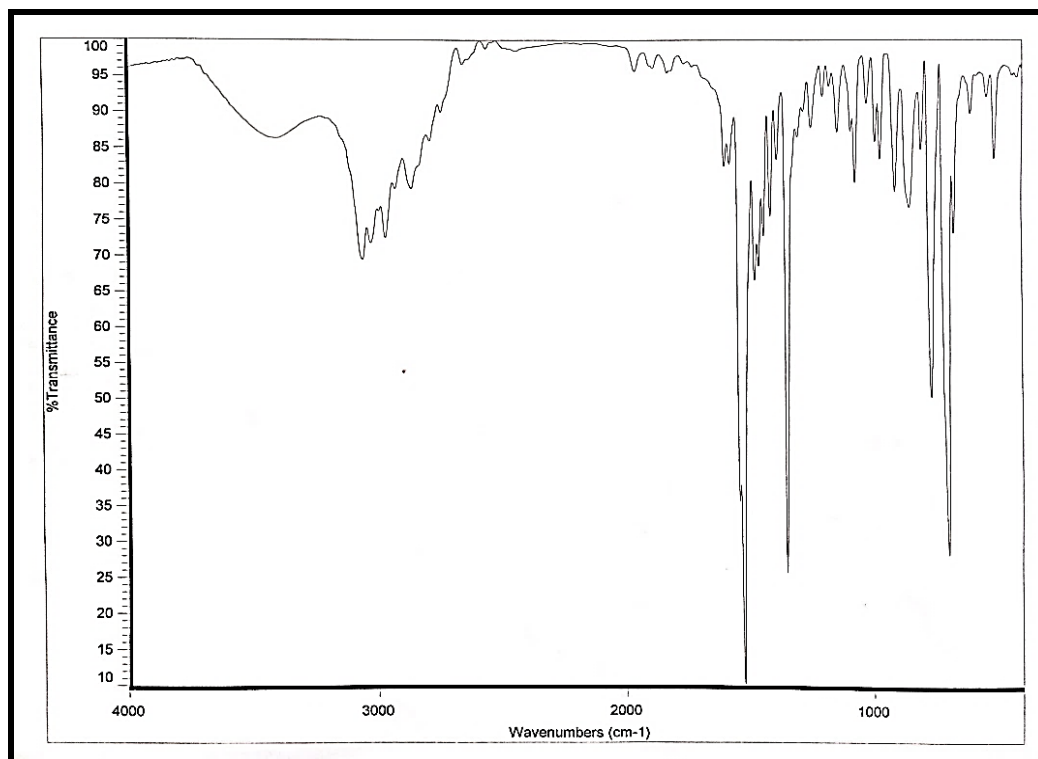

FT-IR of 4k

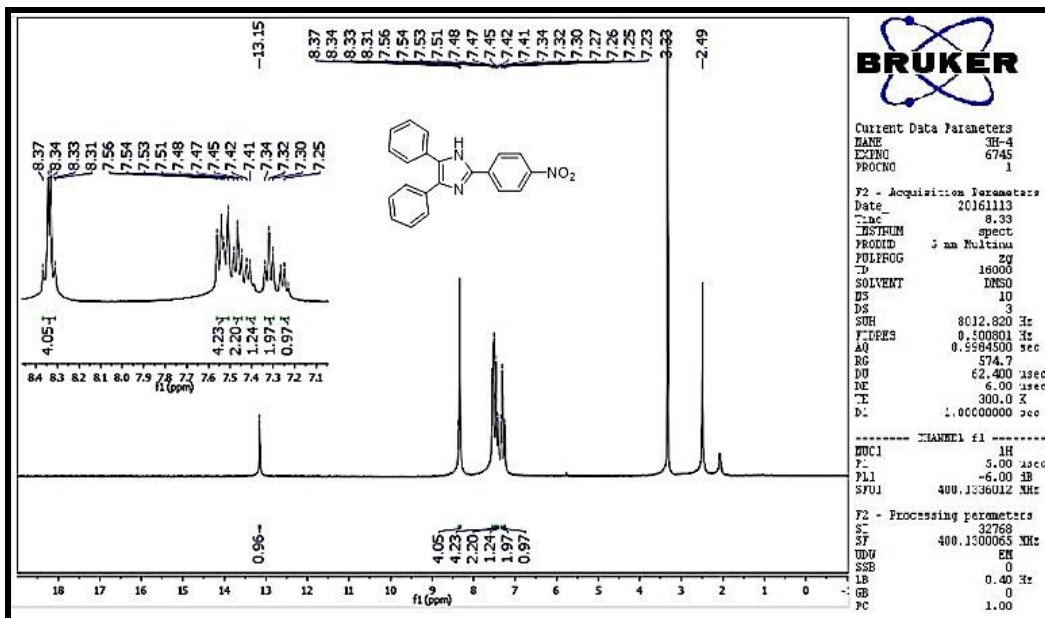

<sup>1</sup>H NMR of **4I**

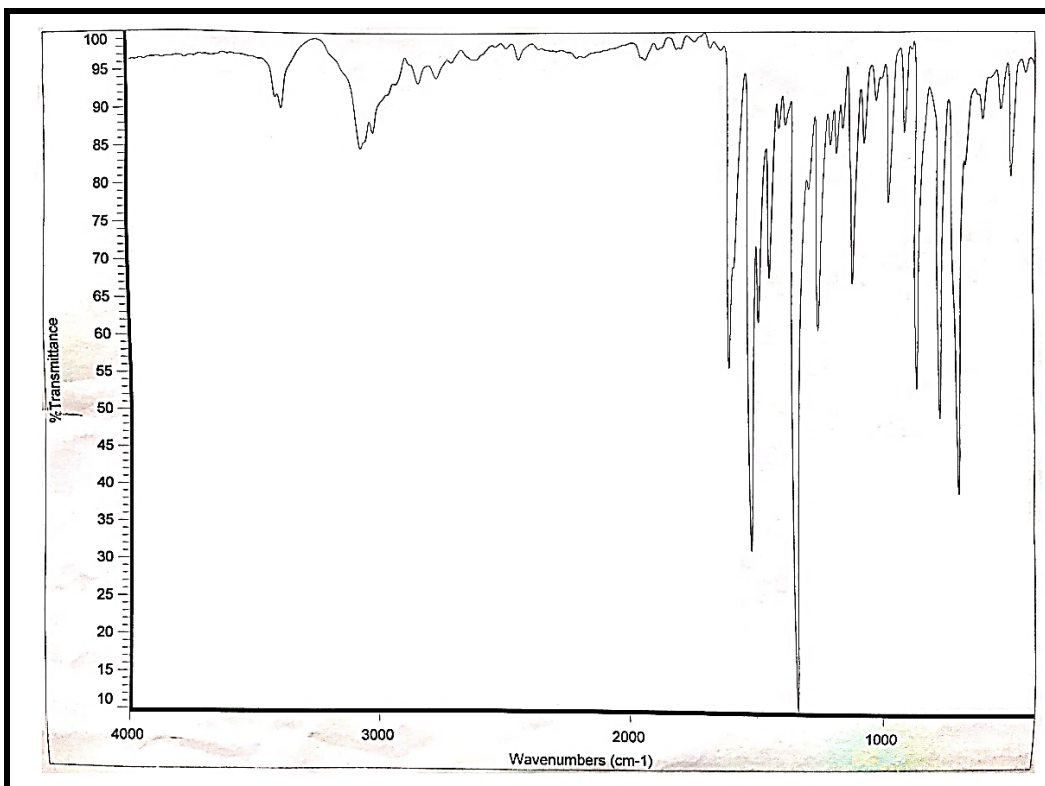

FT-IR of **4I**
